# Supplementary material
Source: MDPI journal article supplement (https://www.mdpi.com/2073-4352/12/7/892)
Supplement: s1 [file s1]

## Article

# Features of the Phase Preferences, Long- and Short-Range Order in $Ln_2(WO_4)_3$ ( $Ln = Gd, Dy, Ho, Yb$ ) with Their Relation to Hydration Behavior

Victor V. Popov<sup>1,2\*</sup>, Yan V. Zubavichus<sup>3\*</sup>, Alexey P. Menushenkov<sup>1</sup>, Alexey A. Yastrebtsev<sup>1</sup>, Bulat R. Gaynanov<sup>1</sup>, Sergey G. Rudakov<sup>1</sup>, Andrey A. Ivanov<sup>1</sup>, Fyodor E. Dubyago<sup>1</sup>, Roman D. Svetogorov<sup>2</sup>, Evgeny V. Khramov<sup>2</sup>, Nadezhda A. Tsarenko<sup>4</sup>, Nataliya V. Ognevskaya<sup>4</sup>, Igor V. Shchetinin<sup>5</sup>

<sup>1</sup> Department of Solid State Physics and Nanosystems, National Research Nuclear University MEPhI (Moscow Engineering Physics Institute), Moscow, 115409, Russia

<sup>2</sup> Kurchatov Synchrotron Radiation Source, National Research Center Kurchatov Institute, Moscow, 123182, Russia

<sup>3</sup> Synchrotron Radiation Facility SKIF, Boreskov Institute of Catalysis SB RAS, Koltsovo, 630559, Russia

<sup>4</sup> JSC Design & Survey and Research & Development Institute of Industrial Technology, Moscow, 115409, Russia

<sup>5</sup> Material Science Department, National University of Science and Technology MISiS, Moscow, 119049, Russia

\* Correspondence: vvpopov@mephi.ru (V. V. P.); yvz@catalysis.ru (Y. V. Z.)

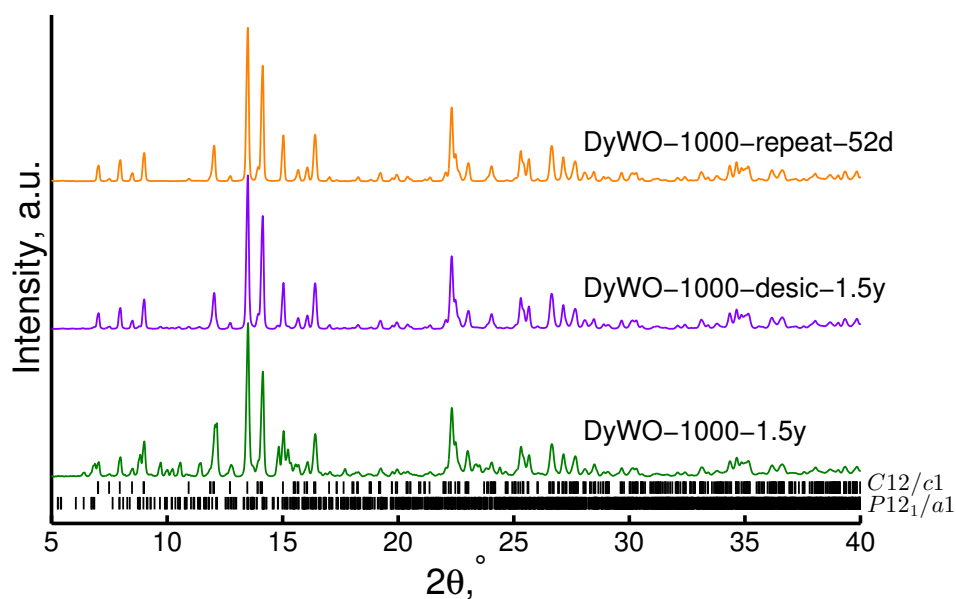

**Figure S1.** XRD patterns of  $Dy_2(WO_4)_3$  powders prepared under different conditions. A detailed description of samples' codenames are given in Table 1 of the main text.

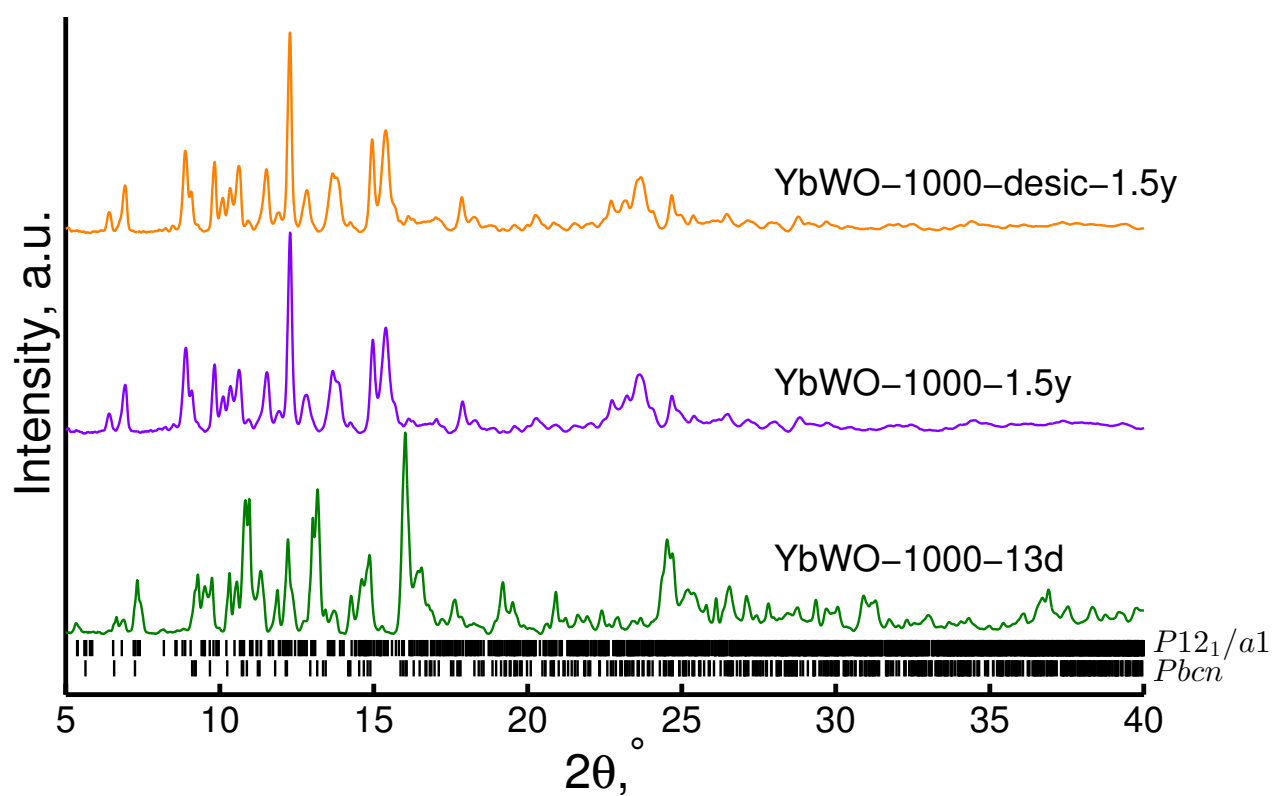

**Figure S2.** XRD patterns of  $\text{Yb}_2(\text{WO}_4)_3$  powders prepared under different conditions. A detailed description of samples' codenames are given in Table 1 of the main text.

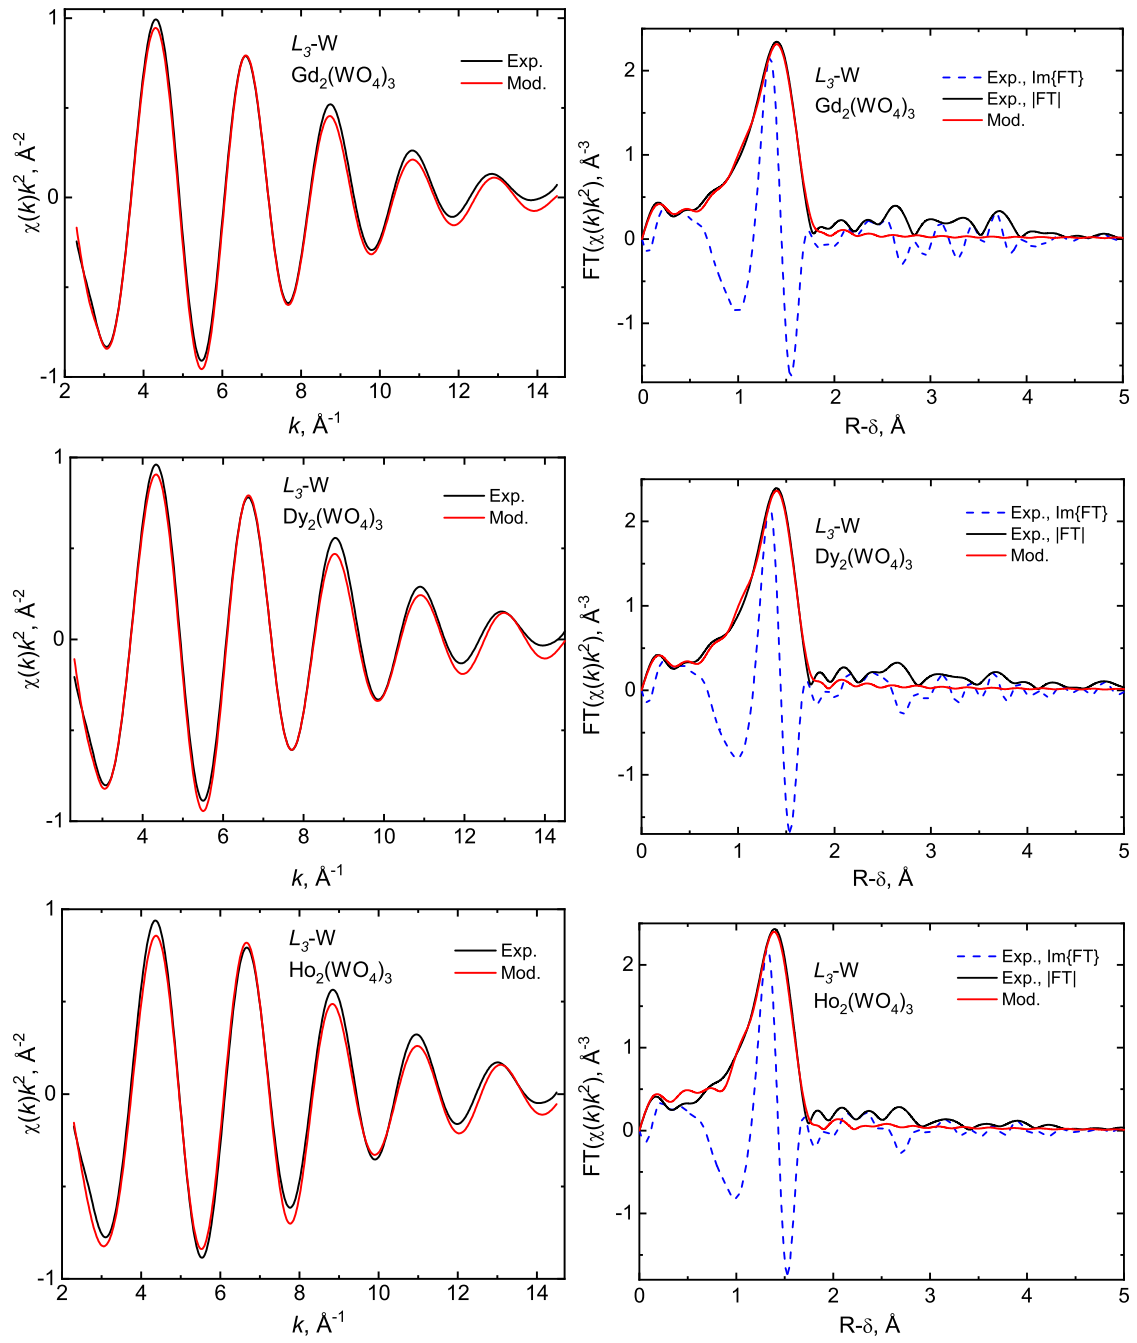

**Figure S3.** The experimental and fitted  $k^2$ -weighted EXAFS-functions  $\chi(k)k^2$  (left panel) measured above the  $L_3$ -W edge and their Fourier transform magnitudes and imaginary parts (right panel) for the series of well-crystallized  $Ln_2(WO_4)_3$ -1000°C ( $Ln = \text{Gd, Dy, Ho}$ ) powders. Best-fit curves correspond to the local-structure parameters given in Table 3 of the main text.

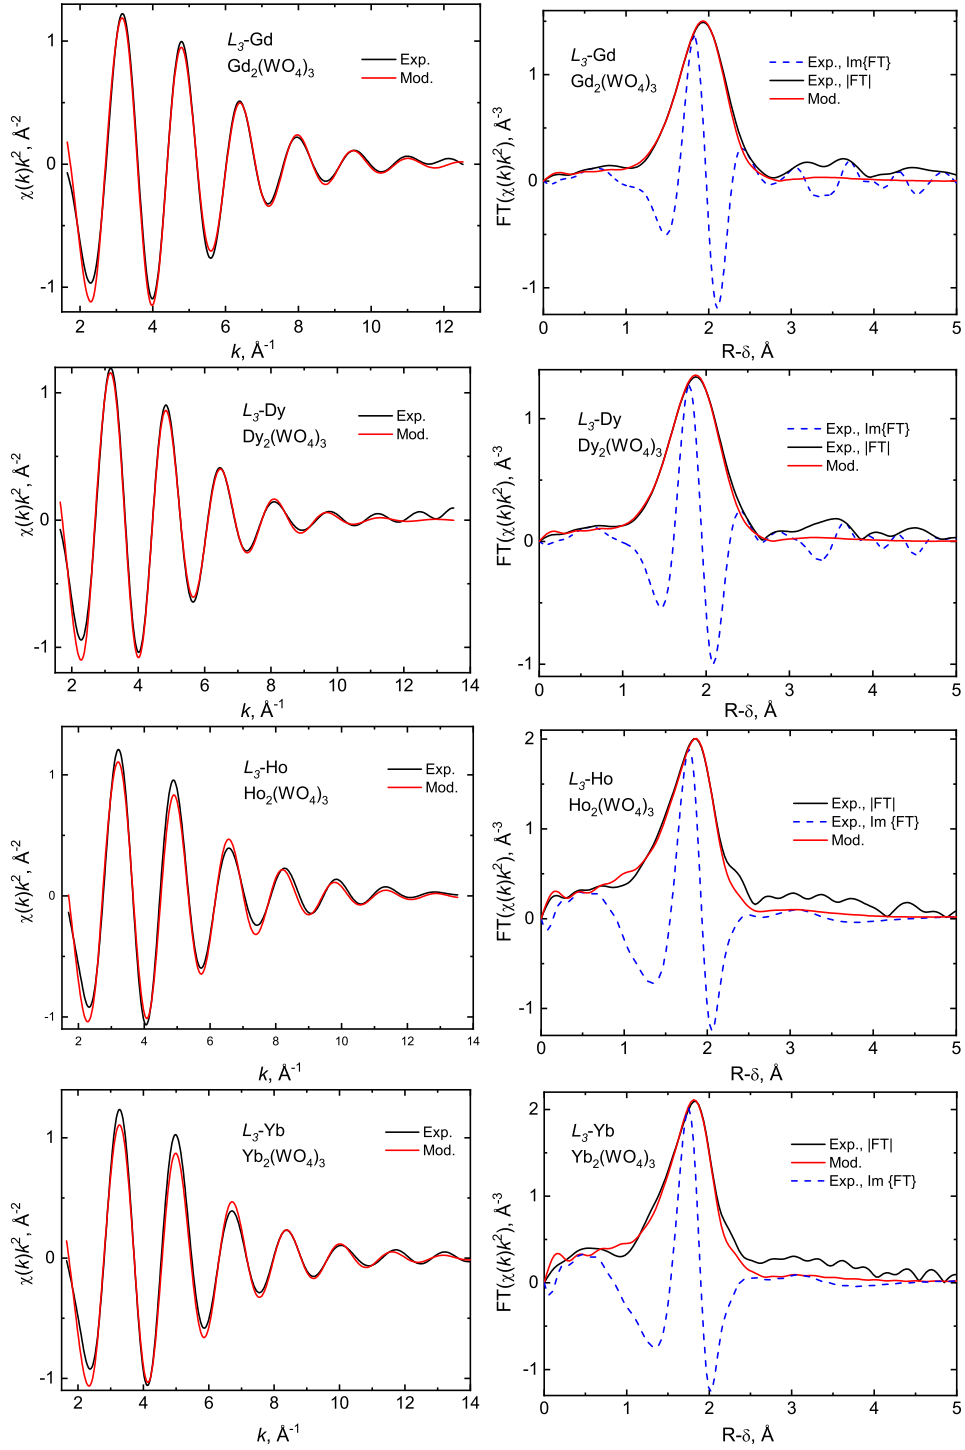

**Figure S4.** The experimental and fitted  $k^2$ -weighted EXAFS-functions  $\chi(k)k^2$  (left panel) measured above the  $L_3\text{-Ln}$  edge and their Fourier transform magnitudes and imaginary parts (right panel) for the series of well-crystallized  $Ln_2(WO_4)_3$ -1000°C ( $Ln = \text{Gd, Dy, Ho, Yb}$ ) powders. Best-fit curves correspond to the local-structure parameters given in Table 4 of the main text.

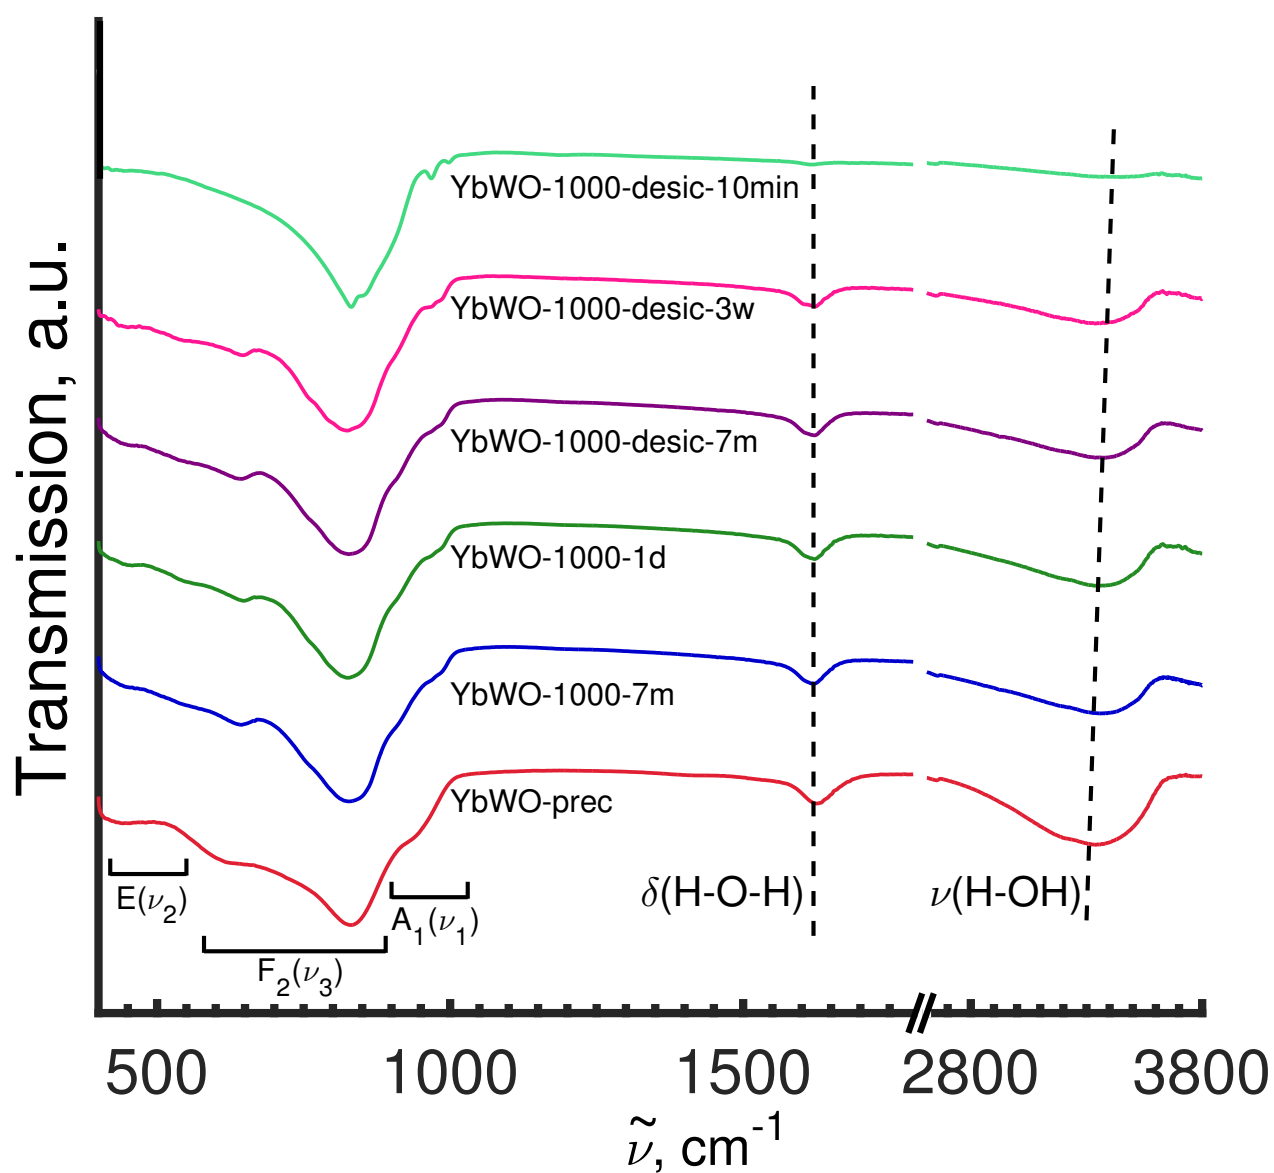

**Figure S5.** FT-IR spectra of  $\text{Yb}_2(\text{WO}_4)_3$  powders prepared under different conditions.

**Table S1.** Composition, crystal structure and lattice parameters of heavy *Ln* tungstates according to literature

| Composition                                                         | Type of crystal structure (sp. gr.)              | Lattice parameters                                                                                                                                                  | References |
|---------------------------------------------------------------------|--------------------------------------------------|---------------------------------------------------------------------------------------------------------------------------------------------------------------------|------------|
| Y <sub>2</sub> (WO <sub>4</sub> ) <sub>3</sub>                      | Orthorhombic                                     | $a = 10.0838 \text{ \AA}; b = 13.9593 \text{ \AA}; c = 9.9705 \text{ \AA}; V = 1386.2 \text{ \AA}^3$                                                                | [1]        |
|                                                                     | Orthorhombic (sp. gr. <i>Pnca</i> )              | $a = 10.074(2) \text{ \AA}; b = 13.952(2) \text{ \AA}; c = 9.990(2) \text{ \AA}; V = 1404.4(3) \text{ \AA}^3$                                                       | [2]        |
| Y <sub>2</sub> (WO <sub>4</sub> ) <sub>3</sub> ·3H <sub>2</sub> O   | Structure B (tri-hydrate formed hygroscopically) | N/A                                                                                                                                                                 | [3]        |
|                                                                     | Monoclinic (sp. gr. <i>P2/m</i> )                | $a = 14.308 \text{ \AA}; b = 4.354 \text{ \AA}; c = 12.430 \text{ \AA}; \beta = 119.78^\circ; V = 672.1 \text{ \AA}^3$                                              | [4]        |
|                                                                     | Monoclinic                                       | $a = 16.3735 \text{ \AA}; b = 10.1174 \text{ \AA}; c = 19.3726 \text{ \AA}; \beta = 125.51^\circ; V = 2954.99 \text{ \AA}^3$                                        | [1]        |
|                                                                     | Pseudo-orthorhombic                              | $a = 10.1174 \text{ \AA}; b = 13.3301 \text{ \AA}; c = 9.6863 \text{ \AA}; \beta = 89.24^\circ; V = 1287.74 \text{ \AA}^3$                                          | [1]        |
|                                                                     | Orthorhombic                                     | $a = 10.098(1) \text{ \AA}; b = 13.315(3) \text{ \AA}; c = 9.691(4) \text{ \AA}; V = 1303.1(4) \text{ \AA}^3$                                                       | [2]        |
| Y <sub>2</sub> (WO <sub>4</sub> ) <sub>3</sub> ·2.5H <sub>2</sub> O | Monoclinic (sp. gr. <i>P2/m</i> )                | $a = 16.7267 \text{ \AA}; b = 10.0449 \text{ \AA}; c = 19.2045 \text{ \AA}; \beta = 126.91^\circ; V = 2942.70 \text{ \AA}^3$                                        | [5]        |
| Dy <sub>2</sub> (WO <sub>4</sub> ) <sub>3</sub>                     | Monoclinic (sp. gr. <i>C12/c1</i> )              | $a = 7.5981(1) \text{ \AA}; b = 11.3220(1) \text{ \AA}; c = 11.3254(1) \text{ \AA}; \beta = 109.8001(3)^\circ; V = 962.76 \text{ \AA}^3$                            | [6]        |
|                                                                     | Orthorhombic (sp. gr. <i>Pnca</i> )              | $a = 7.613(3) \text{ \AA}; b = 11.362(7) \text{ \AA}; c = 11.351(4) \text{ \AA}; V = 925.3(8) \text{ \AA}^3$                                                        | [2]        |
| Ho <sub>2</sub> (WO <sub>4</sub> ) <sub>3</sub>                     | Monoclinic                                       | $a = 7.5861(2) \text{ \AA}; b = 11.3157(3) \text{ \AA}; c = 11.3062(3) \text{ \AA}; \beta = 109.751(1)^\circ; V = 913.45(5) \text{ \AA}^3$<br>(unhydrated at 200°C) | [7]        |
| Ho <sub>2</sub> (WO <sub>4</sub> ) <sub>3</sub> ·3H <sub>2</sub> O  | Structure B (tri-hydrate formed hygroscopically) | N/A                                                                                                                                                                 | [3]        |
| Er <sub>2</sub> (WO <sub>4</sub> ) <sub>3</sub>                     | Orthorhombic (sp. gr. <i>Pnca</i> )              | $a = 10.045(3) \text{ \AA}; b = 13.900(3) \text{ \AA}; c = 9.949(2) \text{ \AA}; V = 1389.4(4) \text{ \AA}^3$                                                       | [2]        |
| Er <sub>2</sub> (WO <sub>4</sub> ) <sub>3</sub> ·3H <sub>2</sub> O  | Orthorhombic                                     | $a = 10.083(5) \text{ \AA}; b = 13.246(6) \text{ \AA}; c = 9.675(5) \text{ \AA}; V = 1292.2(8) \text{ \AA}^3$                                                       | [2]        |
| Tm <sub>2</sub> (WO <sub>4</sub> ) <sub>3</sub>                     | Orthorhombic                                     | $a = 9.9809(8) \text{ \AA}; b = 13.8294(10) \text{ \AA}; c = 9.8953(8) \text{ \AA}; V = 1365.8(2) \text{ \AA}^3$<br>(unhydrated at 200°C)                           | [7]        |
| Yb <sub>2</sub> (WO <sub>4</sub> ) <sub>3</sub>                     | Orthorhombic (sp. gr. <i>Pnca</i> )              | $a = 9.970(5) \text{ \AA}; b = 13.810(6) \text{ \AA}; c = 9.887(4) \text{ \AA}; V = 1361.5(8) \text{ \AA}^3$                                                        | [2]        |
| Yb <sub>2</sub> (WO <sub>4</sub> ) <sub>3</sub> ·3H <sub>2</sub> O  | Orthorhombic                                     | $a = 10.046(4) \text{ \AA}; b = 13.164(4) \text{ \AA}; c = 9.598(4) \text{ \AA}; V = 1269.4(6) \text{ \AA}^3$                                                       | [2]        |
| Lu <sub>2</sub> (WO <sub>4</sub> ) <sub>3</sub>                     | Orthorhombic (sp. gr. <i>Pnca</i> )              | $a = 9.982(4) \text{ \AA}; b = 13.806(4) \text{ \AA}; c = 9.888(3) \text{ \AA}; V = 1362.6(6) \text{ \AA}^3$                                                        | [2]        |
|                                                                     | Orthorhombic (sp. gr. <i>Pbcn</i> )              | $a = 13.782 \text{ \AA}; b = 9.873 \text{ \AA}; c = 9.961 \text{ \AA}; V = 1355.4 \text{ \AA}^3$                                                                    | [8]        |
| Lu <sub>2</sub> (WO <sub>4</sub> ) <sub>3</sub> ·3H <sub>2</sub> O  | Orthorhombic                                     | $a = 10.050(5) \text{ \AA}; b = 13.179(8) \text{ \AA}; c = 9.584(6) \text{ \AA}; V = 1269.5(9) \text{ \AA}^3$                                                       | [2]        |

N/A - not available

**Table S2.** The full list of sample codenames under study

| #  | Ln type | Sample codename       | Technique(s) applied                  | Apparent hydration degree / Chemical composition                                                                                                                                                       | Phase Composition                        |
|----|---------|-----------------------|---------------------------------------|--------------------------------------------------------------------------------------------------------------------------------------------------------------------------------------------------------|------------------------------------------|
| 1  | Gd      | GdWO-prec             | STA, XRD, Raman, FT-IR                | $\text{Gd}_2(\text{WO}_4)_3 \cdot 5.0\text{H}_2\text{O}$                                                                                                                                               | Amorphous                                |
| 2  | Gd      | GdWO-500-6d           | XRD, Raman, FT-IR                     |                                                                                                                                                                                                        | Amorphous                                |
| 3  | Gd      | GdWO-550-6d           | XRD, Raman, FT-IR                     |                                                                                                                                                                                                        | Amorphous                                |
| 4  | Gd      | GdWO-600-6d           | XRD, Raman, FT-IR                     |                                                                                                                                                                                                        | C12/c1                                   |
| 5  | Gd      | GdWO-700-6d           | XRD, Raman, FT-IR                     |                                                                                                                                                                                                        | C12/c1                                   |
| 6  | Gd      | GdWO-800-6d           | XRD, Raman, FT-IR                     |                                                                                                                                                                                                        | C12/c1                                   |
| 7  | Gd      | GdWO-900-6d           | XRD, Raman, FT-IR                     |                                                                                                                                                                                                        | C12/c1                                   |
| 8  | Gd      | GdWO-1000-14d         | s-XRD                                 |                                                                                                                                                                                                        | C12/c1                                   |
| 9  | Gd      | GdWO-1000-1.5y        | STA, s-XRD, XANES/EXAFS, Raman, FT-IR | $\text{Gd}_2(\text{WO}_4)_3 \cdot 0.02\text{H}_2\text{O}$                                                                                                                                              | C12/c1                                   |
| 10 | Dy      | DyWO-prec             | STA, XRD, Raman, FT-IR                | $\text{Dy}_2(\text{WO}_4)_3 \cdot 4.8\text{H}_2\text{O}$                                                                                                                                               | Amorphous                                |
| 11 | Dy      | DyWO-600-6d           | XRD                                   |                                                                                                                                                                                                        | C12/c1                                   |
| 12 | Dy      | DyWO-1000-1d          | STA, FT-IR                            | $\text{Dy}_2(\text{WO}_4)_3 \cdot 1.7\text{H}_2\text{O}$                                                                                                                                               |                                          |
| 13 | Dy      | DyWO-1000-9d          | STA                                   | $\text{Dy}_2(\text{WO}_4)_3 \cdot 1.8\text{H}_2\text{O}$                                                                                                                                               |                                          |
| 14 | Dy      | DyWO-1000-11d         | s-XRD                                 |                                                                                                                                                                                                        | 0.57C12/c1 + 0.43 P12 <sub>1</sub> /a1   |
| 15 | Dy      | DyWO-1000-7m          | FT-IR                                 |                                                                                                                                                                                                        |                                          |
| 16 | Dy      | DyWO-1000-1.5y        | STA, s-XRD, XANES/EXAFS, Raman        | $\text{Dy}_2(\text{WO}_4)_3 \cdot 1.8\text{H}_2\text{O}$ or $0.47 \text{Dy}_2(\text{WO}_4)_3(\text{C12}/c1)$<br>+ $0.53 \text{Dy}_2(\text{WO}_4)_3 \cdot 3.4\text{H}_2\text{O}$ (P12 <sub>1</sub> /a1) | 0.47C12/c1<br>+ 0.53P12 <sub>1</sub> /a1 |
| 17 | Dy      | DyWO-1000-desic-10min | Raman, FT-IR                          |                                                                                                                                                                                                        |                                          |
| 18 | Dy      | DyWO-1000-desic-7m    | FT-IR                                 |                                                                                                                                                                                                        |                                          |
| 19 | Dy      | DyWO-1000-desic-1.5y  | STA, s-XRD, Raman                     | $\text{Dy}_2(\text{WO}_4)_3 \cdot 0.5\text{H}_2\text{O}$                                                                                                                                               | 0.88C12/c1 + 0.12P12 <sub>1</sub> /a1    |
| 20 | Dy      | DyWO-1000-repeat-1d   | FT-IR                                 |                                                                                                                                                                                                        |                                          |
| 21 | Dy      | DyWO-1000-repeat-7d   | STA                                   | $\text{Dy}_2(\text{WO}_4)_3 \cdot 0.02\text{H}_2\text{O}$                                                                                                                                              |                                          |
| 22 | Dy      | DyWO-1000-repeat-52d  | s-XRD                                 |                                                                                                                                                                                                        | C12/c1                                   |
| 23 | Ho      | HoWO-prec             | STA, XRD, Raman, FT-IR                | $\text{Ho}_2(\text{WO}_4)_3 \cdot 5.4\text{H}_2\text{O}$                                                                                                                                               | Amorphous                                |
| 24 | Ho      | HoWO-600-6d           | XRD                                   |                                                                                                                                                                                                        | Amorphous                                |
| 25 | Ho      | HoWO-1000-1d          | STA, FT-IR                            | $\text{Ho}_2(\text{WO}_4)_3 \cdot 3.1\text{H}_2\text{O}$                                                                                                                                               |                                          |
| 26 | Ho      | HoWO-1000-7d          | STA                                   | $\text{Ho}_2(\text{WO}_4)_3 \cdot 3.3\text{H}_2\text{O}$                                                                                                                                               |                                          |
| 27 | Ho      | HoWO-1000-9d          | s-XRD                                 |                                                                                                                                                                                                        | P12 <sub>1</sub> /a1                     |
| 28 | Ho      | HoWO-1000-7m          | FT-IR                                 |                                                                                                                                                                                                        |                                          |
| 29 | Ho      | HoWO-1000-1.5y        | STA, s-XRD, XANES/EXAFS, Raman        | $\text{Ho}_2(\text{WO}_4)_3 \cdot 3.5\text{H}_2\text{O}$                                                                                                                                               | P12 <sub>1</sub> /a1                     |
| 30 | Ho      | HoWO-1000-desic-10min | Raman, FT-IR                          |                                                                                                                                                                                                        |                                          |
| 31 | Ho      | HoWO-1000-desic-3w    | FT-IR                                 |                                                                                                                                                                                                        |                                          |
| 32 | Ho      | HoWO-1000-desic-7m    | FT-IR                                 |                                                                                                                                                                                                        |                                          |
| 33 | Ho      | HoWO-1000-desic-1.5y  | STA, s-XRD, Raman                     | $\text{Ho}_2(\text{WO}_4)_3 \cdot 3.3\text{H}_2\text{O}$                                                                                                                                               | P12 <sub>1</sub> /a1                     |

|    |    |                       |                                |                                                          |                         |
|----|----|-----------------------|--------------------------------|----------------------------------------------------------|-------------------------|
| 34 | Ho | HoWO-1000-repeat-7d   | STA                            | $\text{Ho}_2(\text{WO}_4)_3 \cdot 3.0\text{H}_2\text{O}$ |                         |
| 35 | Yb | YbWO-prec             | STA, XRD, Raman, FT-IR         | $\text{Yb}_2(\text{WO}_4)_3 \cdot 4.7\text{H}_2\text{O}$ | Amorphous               |
| 36 | Yb | YbWO-600-6d           | XRD                            |                                                          | $P12_1/a1$              |
| 37 | Yb | YbWO-1000-1d          | STA, FT-IR                     | $\text{Yb}_2(\text{WO}_4)_3 \cdot 3.0\text{H}_2\text{O}$ |                         |
| 38 | Yb | YbWO-1000-9d          | STA                            | $\text{Yb}_2(\text{WO}_4)_3 \cdot 3.1\text{H}_2\text{O}$ |                         |
| 39 | Yb | YbWO-1000-13d         | s-XRD                          |                                                          | $0.5P12_1/a1 + 0.5Pbcn$ |
| 40 | Yb | YbWO-1000-7m          | FT-IR                          |                                                          |                         |
| 41 | Yb | YbWO-1000-1.5y        | STA, s-XRD, XANES/EXAFS, Raman | $\text{Yb}_2(\text{WO}_4)_3 \cdot 3.1\text{H}_2\text{O}$ | $P12_1/a1$              |
| 42 | Yb | YbWO-1000-desic-10min | Raman, FT-IR                   |                                                          |                         |
| 43 | Yb | YbWO-1000-desic-3w    | FT-IR                          |                                                          |                         |
| 44 | Yb | YbWO-1000-desic-7m    | FT-IR                          |                                                          |                         |
| 45 | Yb | YbWO-1000-desic-1.5y  | STA, s-XRD, Raman              | $\text{Yb}_2(\text{WO}_4)_3 \cdot 3.1\text{H}_2\text{O}$ | $P12_1/a1$              |
| 46 | Yb | YbWO-1000-repeat-9d   | STA                            | $\text{Yb}_2(\text{WO}_4)_3 \cdot 3.1\text{H}_2\text{O}$ |                         |



**Table S3.** STA results of well-crystallized  $LnWO_4$  ( $Ln=Gd, Dy, Ho, Yb$ ) powders stored in air for different periods of time

| Sample               | $T_{deh.}, ^\circ C$ | Dehydration (at 200°C) |                |            |
|----------------------|----------------------|------------------------|----------------|------------|
|                      |                      | $\Delta H_{deh.}, J/g$ | $\Delta m, \%$ | $nH_2O$    |
| GdWO-1000-1.5y       | -                    | -                      | 0.03           | 0.02       |
| DyWO-1000-1d         | 91.0 (shoulder)      | 111                    | 2.7            | 1.7        |
|                      | 109.7                |                        |                |            |
| DyWO-1000-9d         | 109.3                | 112                    | 2.9            | 1.8        |
| DyWO-1000-1.5y       | 127.9                | 110                    | 2.9            | 1.8 (3.4*) |
| DyWO-1000-desic-1.5y | 113.1                | 30.4                   | 0.8            | 0.5        |
| DyWO-1000-repeat-7d  | -                    | -                      | 0.03           | 0.02       |
| HoWO-1000-1d         | 86.4 (shoulder)      | 208                    | 5.0            | 3.1        |
|                      | 106.4                |                        |                |            |
| HoWO-1000-7d         | 107.7                | 209                    | 5.3            | 3.3        |
| HoWO-1000-1.5y       | 117.9                | 229                    | 5.5            | 3.5        |
| HoWO-1000-desic-1.5y | 109.1                | 217                    | 5.2            | 3.3        |
| HoWO-1000-repeat-7d  | 106.6                | 199                    | 4.8            | 3.0        |
| YbWO-1000-1d         | 76.8                 | 185                    | 4.7            | 3.0        |
| YbWO-1000-9d         | 86.1                 | 198                    | 5.0            | 3.1        |
| YbWO-1000-1.5y       | 98.9                 | 199                    | 5.0            | 3.1        |
| YbWO-1000-desic-1.5y | 94                   | 188                    | 5.0            | 3.1        |
| YbWO-1000-repeat-9d  | 92.6                 | 200                    | 5.0            | 3.1        |

\*Recalculated taking into account the volume fraction of the  $P12_1/a1$  phase (see Table S4)

**Table S4.** Rietveld refinement of s-XRD patterns for well-crystallized powders of  $Ln_2(WO_4)_3$ -1000° C ( $Ln = Gd, Dy, Ho, Yb$ )

| Sample               | Structure<br>(space group)                | Content,<br>% | Cell param.,<br>$a, b, c, \text{\AA}, \beta, ^\circ$                              | Cell vol.,<br>$\text{\AA}^3$ | $aL, \text{nm}$ | $b\epsilon, \%$ | $R_p, \%/R_{wp}, \%$ | $\chi^2_{GoF}$ |
|----------------------|-------------------------------------------|---------------|-----------------------------------------------------------------------------------|------------------------------|-----------------|-----------------|----------------------|----------------|
| GdWO-1000-14d        | Monoclinic<br>(C12/c1 (15))               | 100           | $a = 7.6593(4)$<br>$b = 11.4299(6)$<br>$c = 11.4093(6)$<br>$\beta = 109.752(2)$   | 940.07(8)                    | 286(15)         | 0.192(9)        | 6.20/<br>8.52        | 1.36           |
| GdWO-1000-1.5y       | Monoclinic<br>(C12/c1 (15))               | 100           | $a = 7.6581(6)$<br>$b = 11.4282(9)$<br>$c = 11.4071(10)$<br>$\beta = 109.764(3)$  | 939.52(13)                   | 104(3)          | 0.050(15)       | 7.64/<br>11.43       | 1.26           |
| DyWO-1000-11d        | Monoclinic<br>(C12/c1 (15))               | 56.7(3)       | $a = 7.6001(2)$<br>$b = 11.3335(2)$<br>$c = 11.3434(3)$<br>$\beta = 109.785(2)$   | 919.39(3)                    | 171(5)          | 0.417(9)        | 7.45/<br>11.92       | 1.64           |
|                      | Monoclinic<br>(P12 <sub>1</sub> /a1 (14)) | 43.3(3)       | $a = 16.645(2)$<br>$b = 10.1359(7)$<br>$c = 19.407(2)$<br>$\beta = 126.268(5)$    | 2639.9(4)                    | 187(27)         | 0.554(49)       |                      |                |
| DyWO-1000-1.5y       | Monoclinic<br>(C12/c1 (15))               | 47.3(3)       | $a = 7.5966(2)$<br>$b = 11.3295(3)$<br>$c = 11.3394(4)$<br>$\beta = 109.784(3)$   | 918.33(5)                    | 99(3)           | 0.358(15)       | 8.01/<br>11.85       | 1.17           |
|                      | Monoclinic<br>(P12 <sub>1</sub> /a1 (14)) | 52.7(3)       | $a = 16.423(2)$<br>$b = 10.1219(7)$<br>$c = 19.438(2)$<br>$\beta = 126.061(8)$    | 2612.1(5)                    | 78(5)           | 0.287(48)       |                      |                |
| DyWO-1000-desic-1.5y | Monoclinic<br>(C12/c1 (15))               | 88.2(5)       | $a = 7.5984(2)$<br>$b = 11.3302(2)$<br>$c = 11.3387(3)$<br>$\beta = 109.788(2)$   | 918.52(4)                    | 152(5)          | 0.359(10)       | 8.56/<br>12.30       | 1.39           |
|                      | Monoclinic<br>(P12 <sub>1</sub> /a1 (14)) | 11.8(5)       | $a = 16.677(12)$<br>$b = 10.115(5)$<br>$c = 19.494(11)$<br>$\beta = 126.56(4)$    | 2641.0(9)                    | 84(13)          | 0.359(10)       |                      |                |
| DyWO-1000-repeat-52d | Monoclinic<br>(C12/c1 (15))               | 100           | $a = 7.5987(7)$<br>$b = 11.3335(10)$<br>$c = 11.3400(10)$<br>$\beta = 109.788(3)$ | 918.93(14)                   | 137(6)          | 0.208(16)       | 10.70/<br>14.94      | 2.09           |
| HoWO-1000-9d         | Monoclinic<br>(P12 <sub>1</sub> /a1 (14)) | 100           | $a = 16.591(2)$<br>$b = 10.1091(6)$<br>$c = 19.351(2)$<br>$\beta = 126.356(3)$    | 2613.8(3)                    | 485(95)         | 1.020(26)       | 9.04/<br>13.42       | 1.72           |
| HoWO-1000-1.5y       | Monoclinic<br>(P12 <sub>1</sub> /a1 (14)) | 100           | $a = 16.362(2)$<br>$b = 10.0980(6)$<br>$c = 19.376(2)$<br>$\beta = 126.062(5)$    | 2587.9(4)                    | 100(5)          | 0.589(30)       | 10.79/<br>14.89      | 1.36           |
| HoWO-1000-desic-1.5y | Monoclinic<br>(P12 <sub>1</sub> /a1 (14)) | 100           | $a = 16.565(2)$<br>$b = 10.1094(6)$<br>$c = 19.345(2)$<br>$\beta = 126.366(3)$    | 2608.6(3)                    | 223(21)         | 0.902(27)       | 9.38/<br>12.92       | 1.14           |
| YbWO-1000-13d        | Monoclinic                                | 49.6(4)       | $a = 16.517(2)$                                                                   | 2565.3(6)                    | 76(3)           | 0.927(26)       | 7.72 /               | 1.40           |

|                      |  |  |                                  |         |                                                                                |             |         |                |
|----------------------|--|--|----------------------------------|---------|--------------------------------------------------------------------------------|-------------|---------|----------------|
|                      |  |  | ( $P12_1/a1$ (14))               |         | $b = 10.0274(12)$<br>$c = 19.221(2)$<br>$\beta = 126.312(7)$                   |             | 12.16   |                |
|                      |  |  | Orthorhombic<br>( $Pbcn$ (60))   | 50.4(4) | $a = 13.8085(6)$<br>$b = 9.8956(5)$<br>$c = 9.9721(5)$                         | 1362.62(12) | 77(3)   | 0.377(23)      |
| YbWO-1000-1.5y       |  |  | Monoclinic<br>( $P12_1/a1$ (14)) | 100     | $a = 16.461(2)$<br>$b = 10.0022(9)$<br>$c = 19.215(2)$<br>$\beta = 126.335(4)$ | 2548.5(5)   | 256(39) | 1.478(39)      |
|                      |  |  |                                  |         |                                                                                |             |         | 8.72/<br>12.27 |
| YbWO-1000-desic-1.5y |  |  | Monoclinic<br>( $P12_1/a1$ (14)) | 100     | $a = 16.453(2)$<br>$b = 10.0195(7)$<br>$c = 19.205(2)$<br>$\beta = 126.333(3)$ | 2550.4(4)   | 206(20) | 1.213(30)      |
|                      |  |  |                                  |         |                                                                                |             |         | 7.33/<br>10.49 |

<sup>a</sup> $L$  - the crystallite size; <sup>b</sup> $\epsilon$  - the microstrain value; <sup>c</sup> $S_{GoF}$  - the goodness-of-fit.

**Table S5.** Atomic coordinates for the HoWO-1000-1.5y sample according to the Rietveld refinement. The nominal chemical composition of the phase is  $\text{Ho}_2(\text{WO}_4)_3 \cdot 3\text{H}_2\text{O}$

| Atom* | x       | y      | z       | Uiso   |
|-------|---------|--------|---------|--------|
| Ho1   | 0.5949  | 0.5152 | 0.4248  | 0.0137 |
| Ho2   | 0.3528  | 0.49   | 0.0427  | 0.0137 |
| Ho3   | -0.1305 | 0.5154 | -0.1936 | 0.0137 |
| Ho4   | -0.3703 | 0.0041 | -0.3222 | 0.0137 |
| W1    | 0.5163  | 0.261  | 0.4957  | 0.064  |
| W2    | 0.5921  | 0.4001 | 0.2329  | 0.064  |
| W3    | 0.1088  | 0.6603 | -0.1531 | 0.064  |
| W4    | 0.0242  | 0.7523 | 0.0115  | 0.064  |
| W5    | -0.315  | 0.3124 | -0.1893 | 0.064  |
| W6    | -0.6378 | 0.1306 | -0.3927 | 0.064  |
| O1    | 0.4725  | 0.1127 | 0.4529  | 0.1    |
| O2    | 0.4383  | 0.3557 | 0.5015  | 0.1    |
| O3    | 0.5945  | 0.1889 | 0.5939  | 0.1    |
| O4    | 0.5482  | 0.3536 | 0.4437  | 0.1    |
| O5    | 0.7692  | 0.4583 | 0.5305  | 0.1    |
| O6    | 0.4319  | 0.5661 | 0.3116  | 0.1    |
| O7    | 0.6568  | 0.6938 | 0.3913  | 0.1    |
| O8    | 0.6164  | 0.3935 | 0.3324  | 0.1    |
| O9    | 0.6515  | 0.2526 | 0.2512  | 0.1    |
| O10   | 0.6878  | 0.5024 | 0.2623  | 0.1    |
| O11   | 0.5135  | 0.4351 | 0.1309  | 0.1    |
| O12   | 0.4443  | 0.6423 | 0.0131  | 0.1    |
| O13   | 0.4015  | 0.2769 | 0.0165  | 0.1    |
| O14   | 0.3348  | 0.3015 | 0.0992  | 0.1    |
| O15   | 0.327   | 0.6334 | 0.1136  | 0.1    |
| O16   | 0.1968  | 0.5396 | -0.1081 | 0.1    |
| O17   | 0.0806  | 0.7205 | -0.2465 | 0.1    |
| O18   | 0.0066  | 0.5841 | -0.1729 | 0.1    |
| O19   | -0.1509 | 0.4331 | -0.324  | 0.1    |
| O20   | -0.0344 | 0.3101 | -0.0925 | 0.1    |
| O21   | -0.0508 | 0.6313 | -0.0533 | 0.1    |
| O22   | -0.2542 | 0.4388 | -0.1962 | 0.1    |
| O23   | -0.3438 | 0.1829 | -0.2257 | 0.1    |
| O24   | -0.5327 | 0.0568 | -0.3626 | 0.1    |
| O1w   | 0.0785  | 0.7833 | 0.2329  | 0.1    |
| O2w   | 0.3092  | 0.1337 | 0.4336  | 0.1    |
| O3w   | 0.6717  | 0.2042 | 0.4391  | 0.1    |
| O4w   | 0.8416  | 0.1711 | 0.3281  | 0.1    |
| O5w   | 0.1452  | 0.8787 | 0.1254  | 0.1    |
| O6w   | 0.2831  | 0.6958 | -0.1633 | 0.1    |

\*Atomic coordinates and thermal parameters of the oxygen atoms were refined with geometrical constraints. The thermal parameters of heavy atoms, i.e., Ho and W were refined but kept equal for identical elements. The thermal parameters of the oxygen atoms were not refined. Hydrogen atoms of water molecules were not located due to weak contribution to total scattering.

## References

1. Sleight, A.W. Negative Thermal Expansion. *MRS Proc.* **2002**, *755*, 106. <https://doi.org/10.1557/PROC-755-DD10.6>.
2. Sumithra, S.; Umarji, A.M. Role of crystal structure on the thermal expansion of  $Ln_2W_3O_{12}$  ( $Ln = La, Nd, Dy, Y, Er$  and  $Yb$ ). *Solid State Sci.* **2004**, *6*, 1313–1319. <https://doi.org/10.1016/j.solidstatesciences.2004.07.023>.
3. Nassau, K.; Levinstein, H.J.; Loiacono, G.M. A comprehensive study of trivalent tungstates and molybdates of the type  $L_2(MO_4)_3$ . *J. Phys. Chem. Solids* **1965**, *26*, 1805–1816. [https://doi.org/10.1016/0022-3697\(65\)90213-1](https://doi.org/10.1016/0022-3697(65)90213-1).
4. Kol'tsova, T.N. X-ray diffraction study of  $Y_2W_3O_{12} \cdot 3H_2O$ . *Inorg. Mater.* **2001**, *37*, 1175–1177.
5. Pontón, P.I.; Prisco, L.P.; Dosen, A.; Faro, G.S.; de Abreu, M.A.; Marinkovic, B.A. Co-precipitation synthesis of  $Y_2W_3O_{12}$  submicronic powder. *Ceram. Int.* **2017**, *43*, 4222–4228. <https://doi.org/10.1016/j.ceramint.2016.12.055>.
6. Shen, R.; Wang, C.; Wang, T.; Dong, C.; Chen, X.; Liang, J. Crystal Structures of  $Dy_2(WO_4)_3$  and  $GdY(WO_4)_3$ . *Rare Met.* **2003**, *22*, 49–54.
7. Xiao, X.; Cheng, Y.; Peng, J.; Wu, M.; Chen, D.; Hu, Z.; Kiyanagi, R.; Fieramosca, J.; Short, S.; Jorgensen, J. Thermal expansion properties of  $A_2(MO_4)_3$  ( $A=Ho$  and  $Tm$ ;  $M=W$  and  $Mo$ ). *Solid State Sci.* **2008**, *10*, 321–325.
8. Shmurak, S.Z.; Kedrov, V.V.; Kiselev, A.P.; Fursova, T.N.; Zver'kova, I.I.; Khasanov, S.S. Spectral and Structural Characteristics of  $(Lu_{1-x}Eu_x)_2(WO_4)_3$  Tungstates. *Phys. Solid State* **2019**, *61*, 2117–2129. <https://doi.org/10.1134/S1063783419110325>.
